# Supplementary material
Source: PubMed Central journal article supplement (PMC6002856)
Supplement: NIHMS948655-supplement-supplement_1.pdf [file NIHMS948655-supplement-supplement_1.pdf]

## SUPPLEMENTAL MATERIAL

**Online Figure 1.** Transition from metabolically healthy obesity to metabolic syndrome and risk for specific cardiovascular disease events in MESA (Odds ratios and 95% confidence intervals)

**Online Table 1.** Cox proportional hazards models incident cause-specific cardiovascular disease and all-cause mortality (hazard ratios and 95% confidence intervals) by baseline obesity and metabolic syndrome status

**Online Table 2.** Logistic regression for combined cardiovascular disease and all-cause mortality (odds ratios and 95% confidence intervals) by metabolic syndrome status in 4470 MESA participants with normal weight

**Online Figure 1. Transition from metabolically healthy obesity to metabolic syndrome and risk for specific cardiovascular disease events in MESA (Odds ratios and 95% confidence intervals)**

MHN = Metabolically healthy normal weight throughout; MHO = Metabolically healthy obesity throughout; MHO to MUO = Transition from metabolically healthy obesity at baseline to metabolically unhealthy obesity; MUO = Metabolically unhealthy obesity from baseline

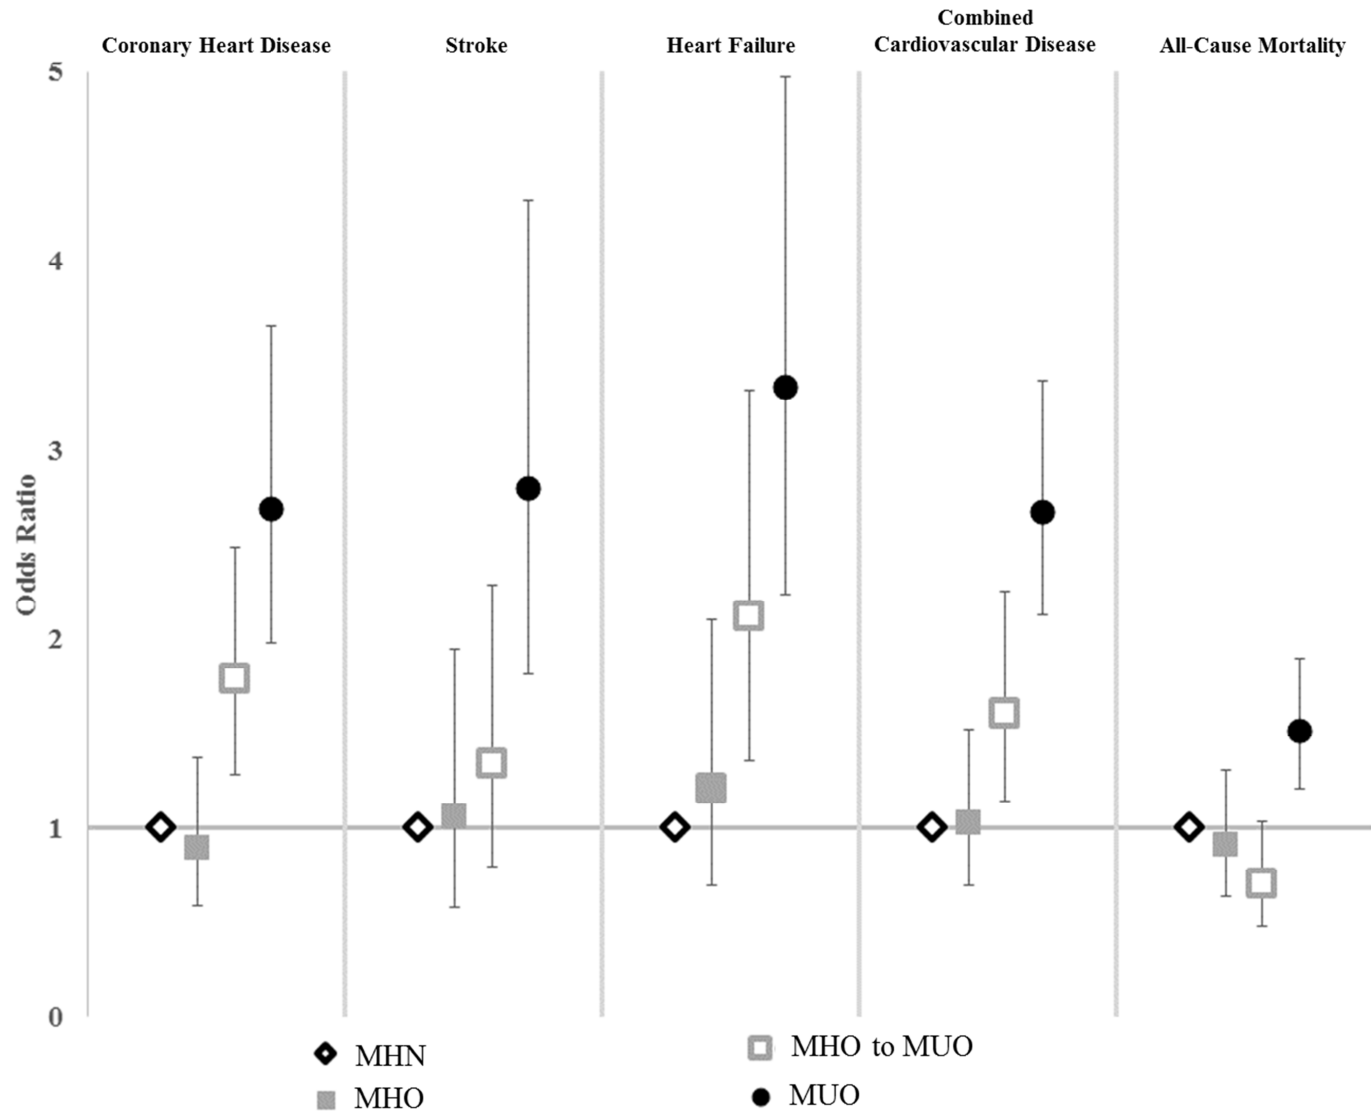

**Online Table 1. Cox proportional hazards models incident cause-specific cardiovascular disease and all-cause mortality (hazard ratios and 95% confidence intervals) by baseline obesity and metabolic syndrome status**

| <b>Model</b>                                  | <b>Events</b> | <b>Healthy Normal Weight (MHN)</b> | <b>Unhealthy Normal Weight (MUN)</b> |                  | <b>Healthy Obesity (MHO)</b> |                  | <b>Unhealthy Obesity (MUO)</b> |                  |
|-----------------------------------------------|---------------|------------------------------------|--------------------------------------|------------------|------------------------------|------------------|--------------------------------|------------------|
|                                               |               | <b>HR</b>                          | <b>HR</b>                            | <b>95% CI</b>    | <b>HR</b>                    | <b>95% CI</b>    | <b>HR</b>                      | <b>95% CI</b>    |
| <b><u>Coronary Heart Disease</u></b>          |               |                                    |                                      |                  |                              |                  |                                |                  |
| Model 1                                       | 538           | 1.0                                | <b>1.99</b>                          | <b>1.59-2.49</b> | 0.75                         | 0.56-1.01        | <b>1.85</b>                    | <b>1.50-2.28</b> |
| Model 2                                       | 538           | 1.0                                | <b>1.72</b>                          | <b>1.38-2.16</b> | 0.93                         | 0.69-1.26        | <b>2.07</b>                    | <b>1.67-2.56</b> |
| Model 3                                       | 529           | 1.0                                | <b>1.99</b>                          | <b>1.58-2.95</b> | 1.03                         | 0.76-1.39        | <b>2.37</b>                    | <b>1.90-2.95</b> |
| Model 4                                       | 516           | 1.0                                | <b>1.98</b>                          | <b>1.57-2.50</b> | 1.05                         | 0.77-1.42        | <b>2.32</b>                    | <b>1.85-2.90</b> |
| <b><u>Stroke</u></b>                          |               |                                    |                                      |                  |                              |                  |                                |                  |
| Model 1                                       | 236           | 1.0                                | <b>1.80</b>                          | <b>1.26-2.55</b> | 0.92                         | 0.61-1.40        | <b>1.93</b>                    | <b>1.41-2.65</b> |
| Model 2                                       | 236           | 1.0                                | <b>1.50</b>                          | <b>1.06-2.14</b> | 1.21                         | 0.79-1.84        | <b>2.25</b>                    | <b>1.64-3.10</b> |
| Model 3                                       | 232           | 1.0                                | <b>1.45</b>                          | <b>1.01-2.09</b> | 1.14                         | 0.74-1.75        | <b>2.03</b>                    | <b>1.46-2.83</b> |
| Model 4                                       | 228           | 1.0                                | <b>1.53</b>                          | <b>1.06-2.20</b> | 1.13                         | 0.73-1.76        | <b>2.12</b>                    | <b>1.51-2.98</b> |
| <b><u>Heart Failure</u></b>                   |               |                                    |                                      |                  |                              |                  |                                |                  |
| Model 1                                       | 279           | 1.0                                | <b>2.25</b>                          | <b>1.64-3.09</b> | 1.03                         | 0.70-1.53        | <b>2.32</b>                    | <b>1.73-3.10</b> |
| Model 2                                       | 279           | 1.0                                | <b>1.86</b>                          | <b>1.35-2.55</b> | 1.43                         | 0.96-2.12        | <b>2.77</b>                    | <b>2.07-3.72</b> |
| Model 3                                       | 274           | 1.0                                | <b>2.13</b>                          | <b>1.54-2.94</b> | 1.41                         | 0.94-2.11        | <b>2.78</b>                    | <b>2.05-3.78</b> |
| Model 4                                       | 270           | 1.0                                | <b>2.20</b>                          | <b>1.58-3.05</b> | <b>1.51</b>                  | <b>1.01-2.27</b> | <b>2.98</b>                    | <b>2.18-4.06</b> |
| <b><u>Combined Cardiovascular Disease</u></b> |               |                                    |                                      |                  |                              |                  |                                |                  |
| Model 1                                       | 791           | 1.0                                | <b>1.97</b>                          | <b>1.64-2.37</b> | 0.81                         | 0.64-1.03        | <b>1.86</b>                    | <b>1.56-2.21</b> |
| Model 2                                       | 791           | 1.0                                | <b>1.68</b>                          | <b>1.39-2.02</b> | 1.03                         | 0.81-1.31        | <b>2.13</b>                    | <b>1.79-2.54</b> |
| Model 3                                       | 777           | 1.0                                | <b>1.86</b>                          | <b>1.53-2.25</b> | 1.09                         | 0.85-1.39        | <b>2.29</b>                    | <b>1.91-2.75</b> |
| Model 4                                       | 761           | 1.0                                | <b>1.87</b>                          | <b>1.54-2.27</b> | 1.10                         | 0.86-1.41        | <b>2.29</b>                    | <b>1.90-2.76</b> |
| <b><u>All-Cause Mortality</u></b>             |               |                                    |                                      |                  |                              |                  |                                |                  |
| Model 1                                       | 975           | 1.0                                | <b>1.68</b>                          | <b>1.43-1.97</b> | <b>0.56</b>                  | <b>0.44-0.70</b> | 1.17                           | 0.99-1.38        |
| Model 2                                       | 975           | 1.0                                | <b>1.34</b>                          | <b>1.14-1.57</b> | 0.81                         | 0.64-1.02        | <b>1.45</b>                    | <b>1.23-1.72</b> |
| Model 3                                       | 943           | 1.0                                | <b>1.45</b>                          | <b>1.23-1.72</b> | 0.80                         | 0.63-1.01        | <b>1.42</b>                    | <b>1.19-1.70</b> |
| Model 4                                       | 928           | 1.0                                | <b>1.46</b>                          | <b>1.23-1.73</b> | 0.85                         | 0.67-1.08        | <b>1.48</b>                    | <b>1.24-1.77</b> |

Model 1: Unadjusted    Model 2: Age    Model 3: Model 2 + sex, race/ethnicity, education, income    Model 4: Model 3 + smoking, LDL, and statin use

**Online Table 2. Logistic regression for combined cardiovascular disease and all-cause mortality (odds ratios and 95% confidence intervals) by metabolic syndrome status in 4470 MESA participants with normal weight**

| <b>Model</b>                         | <b>Metabolic Status</b>  | <b>Coronary Heart Disease</b> |               | <b>Cardiovascular Disease</b> |               | <b>Mortality</b> |               |
|--------------------------------------|--------------------------|-------------------------------|---------------|-------------------------------|---------------|------------------|---------------|
|                                      |                          | <b>OR</b>                     | <b>95% CI</b> | <b>OR</b>                     | <b>95% CI</b> | <b>OR</b>        | <b>95% CI</b> |
| <b>Baseline</b>                      |                          |                               |               |                               |               |                  |               |
|                                      | No MetS                  | 1.0                           | Ref           | 1.0                           | Ref           | 1.0              | Ref           |
|                                      | MetS                     | 2.29                          | 1.78-2.95     | 2.15                          | 1.73-2.67     | 1.67             | 1.35-2.06     |
| <b>Across Follow-Up</b>              |                          |                               |               |                               |               |                  |               |
|                                      | No MetS                  | 1.0                           | Ref           | 1.0                           | Ref           | 1.0              | Ref           |
|                                      | Ever MetS                | 1.93                          | 1.50-2.49     | 1.93                          | 1.55-2.39     | 1.09             | 0.89-1.34*    |
| <b>Metabolic Syndrome Transition</b> |                          |                               |               |                               |               |                  |               |
|                                      | No MetS                  | 1.0                           | Ref           | 1.0                           | Ref           | 1.0              | Ref           |
|                                      | Transition to MetS       | 1.49                          | 1.07-2.07     | 1.56                          | 1.18-2.06     | 0.70             | 0.52-0.92     |
|                                      | MetS at baseline         | 2.43                          | 1.81-3.27     | 2.32                          | 1.79-2.99     | 1.52             | 1.20-1.93     |
| <b>Metabolic Syndrome Duration</b>   |                          |                               |               |                               |               |                  |               |
|                                      | No MetS                  | 1.0                           | Ref           | 1.0                           | Ref           | 1.0              | Ref           |
|                                      | 1 visit with MetS        | 1.70                          | 1.20-2.41     | 1.64                          | 1.22-2.22     | 1.18             | 0.89-1.55*    |
|                                      | 2 visits with MetS       | 1.93                          | 1.30-2.86     | 2.08                          | 1.49-2.91     | 1.31             | 0.95-1.81*    |
|                                      | 3+ visits with MetS      | 2.16                          | 1.55-3.02     | 2.08                          | 1.56-2.77     | 0.85             | 0.64-1.14*    |
|                                      | p-value for linear trend | <0.001                        |               | <0.001                        |               | 0.51             |               |

Model 4: Age, sex, race/ethnicity, education, income, smoking, LDL, and statin use

\*Indicates estimates that are not statistically significant. All other estimates are significantly different from the reference at the p<0.05 level.

MetS = Metabolic syndrome
